# Supplementary material
Source: PubMed Central journal article supplement (PMC7195084)
Supplement: mmc1.pdf [file mmc1.pdf]

# THE LANCET HIV

## Supplementary appendix

This appendix formed part of the original submission and has been peer reviewed. We post it as supplied by the authors.

Supplement to: Hargreaves J, Davey C. Three lessons for the COVID-19 response from pandemic HIV. *Lancet HIV* 2020; published online April 13. [https://doi.org/10.1016/S2352-3018\(20\)30110-7](https://doi.org/10.1016/S2352-3018(20)30110-7).

Members of the **Group for lessons from pandemic HIV prevention for the COVID-19 response**

|            |               |                                   |                 |
|------------|---------------|-----------------------------------|-----------------|
| James      | Hargreaves    | LSHTM                             | UK              |
| Calum      | Davey         | LSHTM                             | UK              |
| Judith     | Auerbach      | UCSF                              | USA             |
| Jamie      | Blanchard     | U.Manitoba                        | Canada          |
| Virginia   | Bond          | LSHTM&Zambart                     | Zambia          |
| Chris      | Bonell        | LSHTM                             | UK              |
| Rochelle   | Burgess       | UCL                               | UK/South Africa |
| Joanna     | Busza         | LSHTM                             | UK              |
| Tim        | Colbourn      | UCL                               | UK              |
| Frances    | Cowan         | LSTM and CeSHHAR Zimbabwe         | UK/Zimbabwe     |
| Aoife      | Doyle         | LSHTM                             | UK              |
| James      | Hakim         | University of Zimbabwe            | Zimbabwe        |
| Bernadette | Hensen        | LSHTM                             | UK              |
| Mina       | Hosseini pour | UNC                               | Malawi/US       |
| Leesa      | Lin           | LSHTM                             | UK              |
| Saul       | Johnson       | Genesis Analytics                 | South Africa    |
| Nyasha     | Masuka        | Independent                       | Zimbabwe        |
| Webster    | Mavhu         | CeSHHAR Zimbabwe and LSTM         | Zimbabwe        |
| Owen       | Mugurungi     | Ministry of Health and Child Care | Zimbabwe        |
| Solomon    | Mukungunugwa  | Ministry of Health and Child Care | Zimbabwe        |
| Angela     | Mushavi       | Ministry of Health and Child Care | Zimbabwe        |
| Andrew     | Phillips      | UCL                               | UK              |
| Lucy       | Platt         | LSHTM                             | UK              |
| Audrey     | Prost         | UCL                               | UK              |
| Eugene     | Ruzagira      | MRC/UVRl and LSHTM                | Uganda          |
| Janet      | Seeley        | LSHTM                             | UK              |
| Isaac      | Taramusi      | National AIDS Council Zimbabwe    | Zimbabwe        |
| Raymond    | Yekeye        | National AIDS Council Zimbabwe    | Zimbabwe        |
